# Supplementary material
Source: PubMed Central journal article supplement (PMC3014016)

### **Supplementary methods**

#### ***Cell culture***

All cell lines were expanded in RPMI 1640 medium (Invitrogen) containing 10% fetal bovine serum (FBS, Gibco), glutamine (Gibco), and penicillin/streptomycin. Before experiments, CCRCC cells were cultured in this medium until they reached confluence, and then for an additional 1-2 days in the same medium without added serum (changed daily and with or without added inhibitors). pCMVR and pBABE infected populations were selected for 14 days and 4 days with G418 (1 mg/ml) and puromycin (2 µg/ml) respectively, this resulted in significant cell death and selection of stable populations which were then expanded. The 9x HRE VEGF reporter has been described elsewhere (supplementary reference 1).

#### ***Small Interfering RNA Transfection, qPCR and ChIP***

siRNA reverse transfections were performed in p6-well plates, each well containing  $5 \times 10^6$  suspended cells and 5 µl LipofectAMINE 2000 (Invitrogen). Oligo concentration was 100 nM unless otherwise indicated. After transfection, cells were allowed to grow for 1-2 days with 10% FBS and then without serum for 1-2 more days before analysis.

ChIP was performed as follows. DNA-protein complexes were cross-linked by adding 0.75% formaldehyde, followed by blocking with glycine. Cells were washed twice with cold PBS and lysed on ice using FA buffer (50 mM HEPES-KOH pH7.5, 140 mM NaCl, 1 mM EDTA pH8., 0, 1% Triton X-100, 0.1% sodium deoxycholate, 0.1% SDS, and protease inhibitors). Chromatin samples were sonicated on ice, diluted in RIPA buffer (50 mM Tris-HCl pH8, 150 mM NaCl, 2 mM EDTA pH8, 1% NP-40, 0.5% sodium deoxycholate, 0.1% SDS and protease inhibitors), centrifuged, and supernatants precleared with protein A sepharose beads pretreated with salmon sperm (Sigma). Antibodies were incubated overnight with the samples on a rotator at 4°C. Fresh protein A sepharose beads with salmon sperm were added afterwards, incubated for 2 hours, and washed at room temperature three times with wash buffer (0.1% SDS, 1% Triton X-100, 2 mM

## VHL regulates HEF1 and Aurora

EDTA, 20 mM Tris-HCl pH 8, 150 mM NaCl) and once with final wash buffer (0.1% SDS, 1% Triton X-100, 2 mM EDTA, 20 mM Tris-HCl pH 8, 500 mM NaCl ). DNA was eluted with elution buffer (1% SDS; 100mM NaHCO<sub>3</sub>), reverse cross-linked and purified by chloroform/phenol extraction.

### *siRNA target sequences and qPCR/ChIP primers*

#### siRNA:

For the firefly luciferase gene see (<http://www.rockefeller.edu/labheads/tuschl/>)

HIF-1 $\alpha$  oligo A 5` - CTGATGACCAGCAACTTGA

HIF-1 $\alpha$  oligo B 5` - CAATCAAGAAGTTGCATTA

HIF-1 $\alpha$  oligo C 5` - CGTTGTGAGTGGTATTATT

HIF-2 $\alpha$  oligo A 5` - CAGCATCTTTGATAGCAGT

HIF-2 $\alpha$  oligo B 5` - GCGACAGCTGGAGTATGAA

HIF-2 $\alpha$  oligo C 5` - GCAAATGTACCCAATGATA

NEDD9 oligo A 5` - CACCCAAGAACAAGAGGTA

NEDD9 oligo B 5` - GGAAAGGGATGGTGTTTAT

#### qPCR:

VEGF-F 5` -TGCCAAGTGGTCCCAG

VEGF-R 5` -GTGAGGTTTGATCCGC

AurkA-F 5` -TTCAGGACCTGTTAAGGCTAC

AurkA-R 5` -TCTGCTTCTGATTCTGAACC

NEDD9-isoform 1-F 5` -CCTCCTTCTCATACCACTCA

NEDD9-isoform 1-R 5` -GCGGGATGTCATACACC

NEDD9-isoform 2-F 5` -CCAGAGAGATGGGCAAGTGT

NEDD9-isoform 2-R 5` -CAAGCCTCCAAACTCAGGAC

p130CAS-F 5` -AACCCCACTGACAAGACCAG

p130CAS-L 5` -TCATAGTCCTCCATCCAGCC

## VHL regulates HEF1 and Aurora

Claudin1-F 5'-GCTTTAAATCGCGGCGCCAG

Claudin1-R 5'-CTCTGGGTCGGGGTTGGGGTC

### ChIP:

EPO-F 5'-CAGGCGTCCTGCCCCCTGCT

EPO-R 5'-CAGCCCGCGAGTACTCACCGTG

NEDD9-1-F 5'-GGAAGGGCTTTGAATCATTGTCCTCCTT

NEDD9-1-R 5'-CCTTGCTTCTCCTCATTGTCCTTAGAGCA

NEDD9-2-F 5'-CTCAGGGACAGCTATTGTCTGGATTAC

NEDD9-2-R 5'-CAGTCTCTCTCCAGCGAAGCACAGAAC

NEDD9-3-F 5'-CCAGGCTCATCAAACAGTGGGCAT

NEDD9-3-R 5'-GTCACACATATTGAGCGACCTTCAGTGG

NEDD9-4-F 5'-CCACTGAAGGTCGCTCAATATGTGTGA

NEDD9-4-R 5'-TGTCAGTCTGCAAGGAGCTGGAAGAC

## Supplementary Figure Legends

### ***Supplementary Figure 1-***

Western blot using the indicated antibodies and lysates from *VHL*-defective RCC10 cells transfected with siRNA oligos (oligo pairs B and C) for HIF-1 $\alpha$ , HIF-2 $\alpha$  and the firefly luciferase gene (control).

### **Supplementary Figure 2-**

(A-C) The number of nuclei stained with DAPI (3 experiments in duplicate and 8 fields per coverslip were analyzed) and number of cells stained with BrDU (3 experiments in duplicate and 8 fields per coverslip) were counted to assess changes in proliferation in the indicated cell lines and treatments. (D) Percentage of BrdU positive cells among all migrated cells (stained with DAPI); the results correspond to 3 experiments in duplicate (4 fields per coverslip).

**Supplementary references**

1. Aragonés J, Jones DR, Martín S, San Juan MA, Alfranca A, Vidal F, Vara A, Merida I, Landazuri MO: Evidence for the involvement of diacylglycerol kinase in the activation of hypoxia-inducible transcription factor 1 by low oxygen tension. *J Biol Chem* 276: 10548-55, 2001

### **Supplementary methods**

#### ***Cell culture***

All cell lines were expanded in RPMI 1640 medium (Invitrogen) containing 10% fetal bovine serum (FBS, Gibco), glutamine (Gibco), and penicillin/streptomycin. Before experiments, CCRCC cells were cultured in this medium until they reached confluence, and then for an additional 1-2 days in the same medium without added serum (changed daily and with or without added inhibitors). pCMVR and pBABE infected populations were selected for 14 days and 4 days with G418 (1 mg/ml) and puromycin (2 µg/ml) respectively, this resulted in significant cell death and selection of stable populations which were then expanded. The 9x HRE VEGF reporter has been described elsewhere (supplementary reference 1).

#### ***Small Interfering RNA Transfection, qPCR and ChIP***

siRNA reverse transfections were performed in p6-well plates, each well containing  $5 \times 10^6$  suspended cells and 5 µl LipofectAMINE 2000 (Invitrogen). Oligo concentration was 100 nM unless otherwise indicated. After transfection, cells were allowed to grow for 1-2 days with 10% FBS and then without serum for 1-2 more days before analysis.

ChIP was performed as follows. DNA-protein complexes were cross-linked by adding 0.75% formaldehyde, followed by blocking with glycine. Cells were washed twice with cold PBS and lysed on ice using FA buffer (50 mM HEPES-KOH pH7.5, 140 mM NaCl, 1 mM EDTA pH8., 0, 1% Triton X-100, 0.1% sodium deoxycholate, 0.1% SDS, and protease inhibitors). Chromatin samples were sonicated on ice, diluted in RIPA buffer (50 mM Tris-HCl pH8, 150 mM NaCl, 2 mM EDTA pH8, 1% NP-40, 0.5% sodium deoxycholate, 0.1% SDS and protease inhibitors), centrifuged, and supernatants precleared with protein A sepharose beads pretreated with salmon sperm (Sigma). Antibodies were incubated overnight with the samples on a rotator at 4°C. Fresh protein A sepharose beads with salmon sperm were added afterwards, incubated for 2 hours, and washed at room temperature three times with wash buffer (0.1% SDS, 1% Triton X-100, 2 mM

## VHL regulates HEF1 and Aurora A

EDTA, 20 mM Tris-HCl pH 8, 150 mM NaCl) and once with final wash buffer (0.1% SDS, 1% Triton X-100, 2 mM EDTA, 20 mM Tris-HCl pH 8, 500 mM NaCl ). DNA was eluted with elution buffer (1% SDS; 100mM NaHCO<sub>3</sub>), reverse cross-linked and purified by chloroform/phenol extraction.

### *siRNA target sequences and qPCR/ChIP primers*

#### siRNA:

For the firefly luciferase gene see (<http://www.rockefeller.edu/labheads/tuschl/>)

HIF-1 $\alpha$  oligo A 5` - CTGATGACCAGCAACTTGA

HIF-1 $\alpha$  oligo B 5` - CAATCAAGAAGTTGCATTA

HIF-1 $\alpha$  oligo C 5` - CGTTGTGAGTGGTATTATT

HIF-2 $\alpha$  oligo A 5` - CAGCATCTTTGATAGCAGT

HIF-2 $\alpha$  oligo B 5` - GCGACAGCTGGAGTATGAA

HIF-2 $\alpha$  oligo C 5` - GCAAATGTACCCAATGATA

NEDD9 oligo A 5` - CACCCAAGAACAAGAGGTA

NEDD9 oligo B 5` - GGAAAGGGATGGTGTTTAT

#### qPCR:

VEGF-F 5` -TGCCAAGTGGTCCCAG

VEGF-R 5` -GTGAGGTTTGATCCGC

AurkA-F 5` -TTCAGGACCTGTTAAGGCTAC

AurkA-R 5` -TCTGCTTCTGATTCTGAACC

NEDD9-isoform 1-F 5` -CCTCCTTCTCATACCACTCA

NEDD9-isoform 1-R 5` -GCGGGATGTCATACACC

NEDD9-isoform 2-F 5` -CCAGAGAGATGGGCAAGTGT

NEDD9-isoform 2-R 5` -CAAGCCTCCAAACTCAGGAC

p130CAS-F 5` -AACCCCACTGACAAGACCAG

p130CAS-L 5` -TCATAGTCCTCCATCCAGCC

## VHL regulates HEF1 and Aurora A

Claudin1-F 5'-GCTTTAAATCGCGGCGCCAG

Claudin1-R 5'-CTCTGGGTCGGGGTTGGGGTC

### ChIP:

EPO-F 5'-CAGGCGTCCTGCCCCCTGCT

EPO-R 5'-CAGCCCGCGAGTACTCACCGTG

NEDD9-1-F 5'-GGAAGGGCTTTGAATCATTGTCCTCCTT

NEDD9-1-R 5'-CCTTGCTTCTCCTCATTGTCCTTAGAGCA

NEDD9-2-F 5'-CTCAGGGACAGCTATTGTCTGGATTAC

NEDD9-2-R 5'-CAGTCTCTCTCCAGCGAAGCACAGAAC

NEDD9-3-F 5'-CCAGGCTCATCAAACAGTGGGCAT

NEDD9-3-R 5'-GTCACACATATTGAGCGACCTTCAGTGG

NEDD9-4-F 5'-CCACTGAAGGTCGCTCAATATGTGTGA

NEDD9-4-R 5'-TGTCAGTCTGCAAGGAGCTGGAAGAC

## Supplementary Figure Legends

### ***Supplementary Figure 1-***

Western blot using the indicated antibodies and lysates from *VHL*-defective RCC10 cells transfected with siRNA oligos (oligo pairs B and C) for HIF-1 $\alpha$ , HIF-2 $\alpha$  and the firefly luciferase gene (control).

### **Supplementary Figure 2-**

(A-C) The number of nuclei stained with DAPI (3 experiments in duplicate and 8 fields per coverslip were analyzed) and number of cells stained with BrDU (3 experiments in duplicate and 8 fields per coverslip) were counted to assess changes in proliferation in the indicated cell lines and treatments. (D) Percentage of BrdU positive cells among all migrated cells (stained with DAPI); the results correspond to 3 experiments in duplicate (4 fields per coverslip).

**Supplementary references**

1. Aragonés J, Jones DR, Martín S, San Juan MA, Alfranca A, Vidal F, Vara A, Merida I, Landazuri MO: Evidence for the involvement of diacylglycerol kinase in the activation of hypoxia-inducible transcription factor 1 by low oxygen tension. *J Biol Chem* 276: 10548-55, 2001



# Suppl. Fig. 1

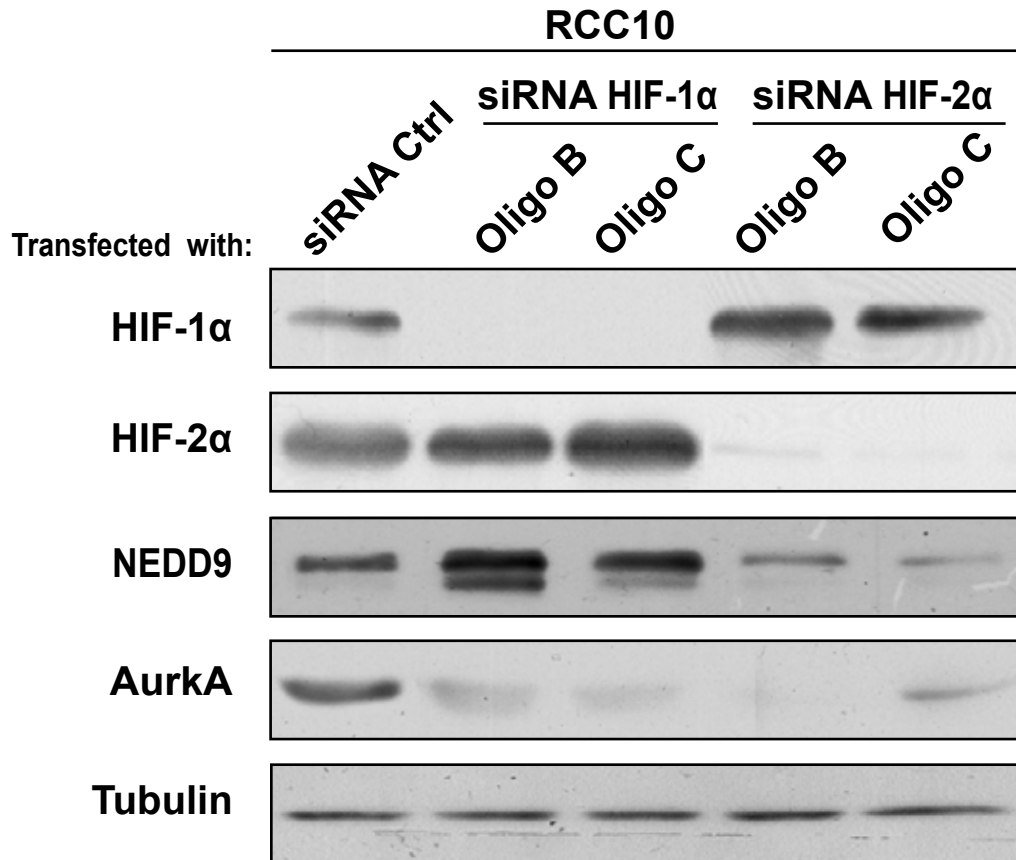

# Suppl. Fig. 2

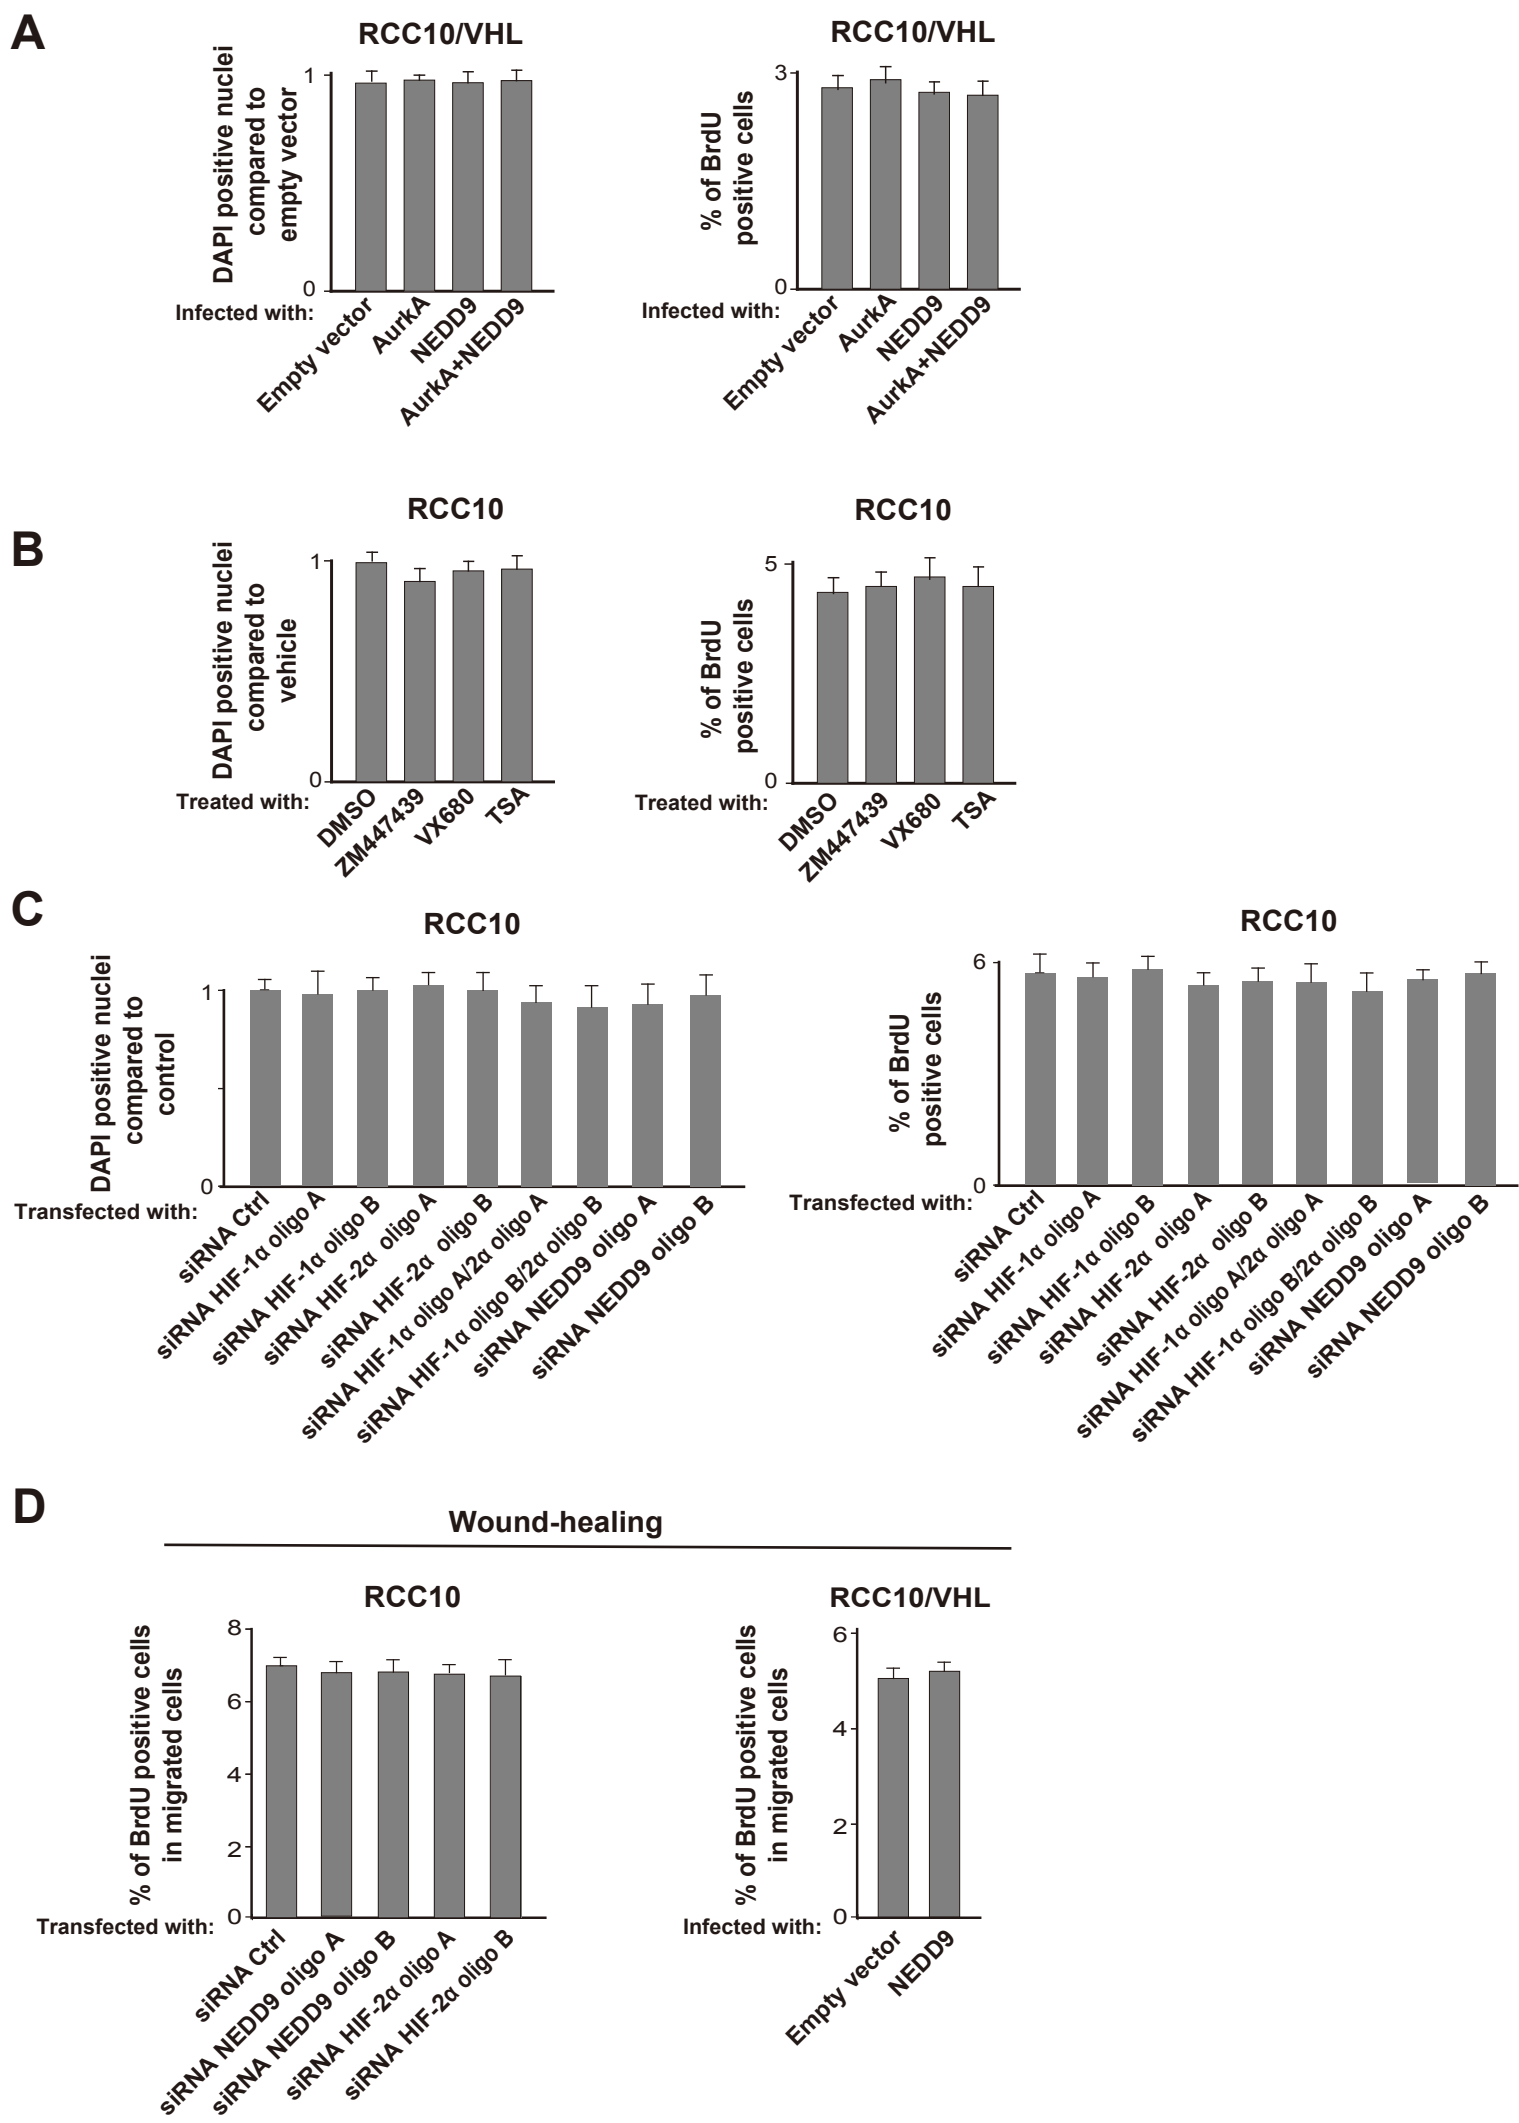

Supplement: supp_ASN.2010040345_Supplementary_data_final.pdf [file supp_ASN.2010040345_Supplementary_data_final.pdf]
